# Supplementary material
Source: PubMed Central journal article supplement (PMC1838478)

Relative ion abundance

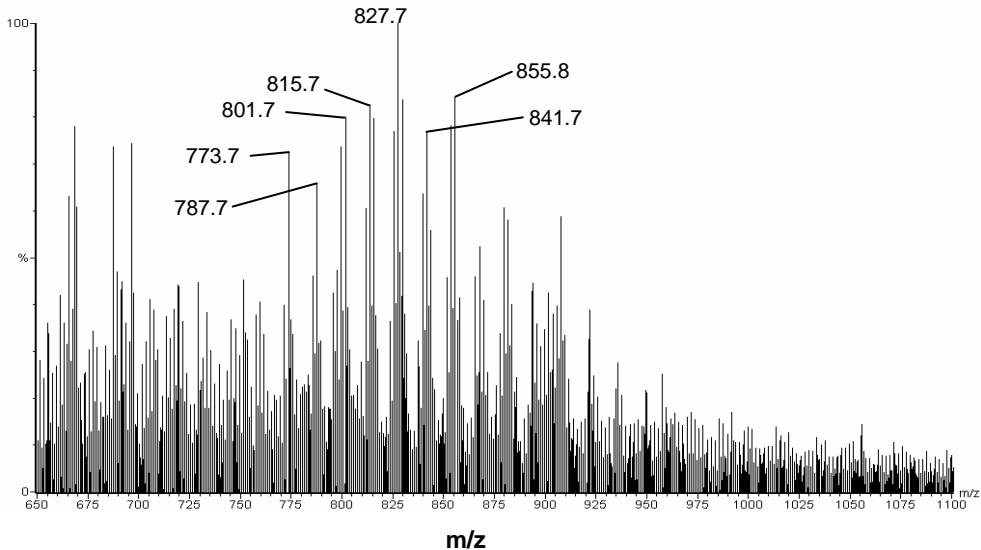

Supplement: pnas_0609590104_1.pdf [file pnas_0609590104_1.pdf]

Relative ion abundance

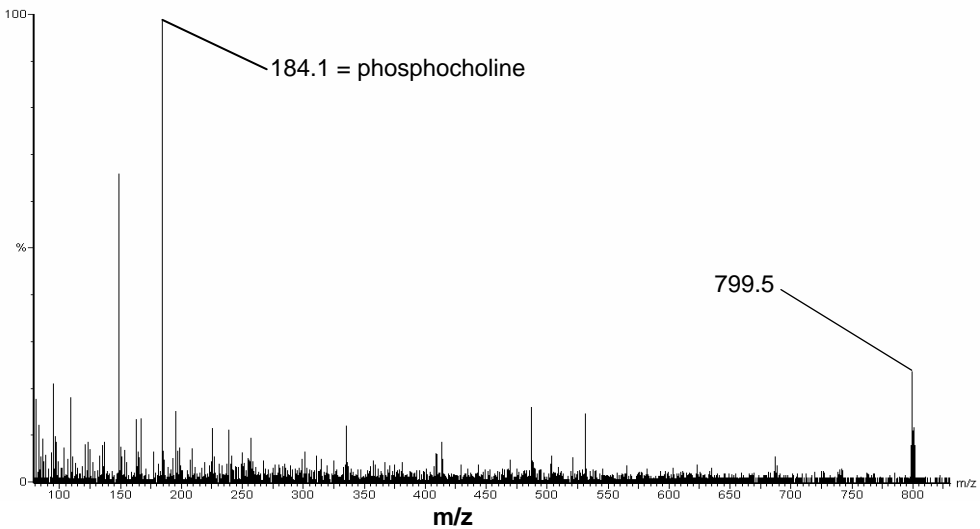

Supplement: pnas_0609590104_2.pdf [file pnas_0609590104_2.pdf]

Relative ion abundance

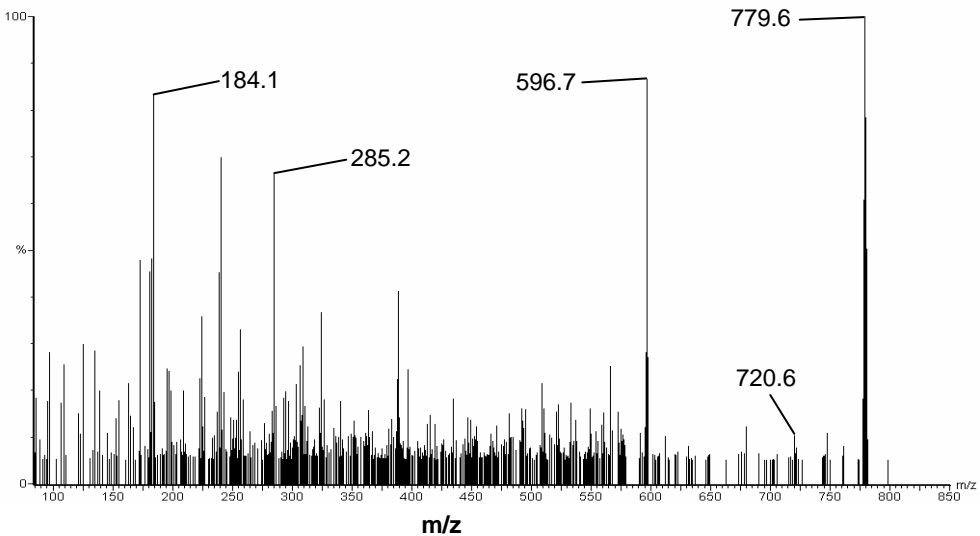

Supplement: pnas_0609590104_3.pdf [file pnas_0609590104_3.pdf]
